# Supplementary material for: The efficacy of computed tomography scanning versus surface scanning in 3D finite element analysis
Source: PeerJ. 2022 Aug 25;10:e13760. doi: 10.7717/peerj.13760 (PMC9420411; doi:10.7717/peerj.13760)
Supplement: Supplemental Information 1 — Each cell value is the muscle force divided by the total number of nodes selected per muscle. [file peerj-10-13760-s001.xlsx]

## Sheet: Rowe & Rayfield muscle forces
Muscle force values for each model.
Crocodile (X Force - N)	m. PTd	m. PTv	m. PSTs	m. PSTp	m. AMEP	m. AMEM	m. AMES	m. AMP		Crocodile (Y Force - N)	m. PTd	m. PTv	m. PSTs	m. PSTp	m. AMEP	m. AMEM	m. AMES	m. AMP		Crocodile (Z Force - N)	m. PTd	m. PTv	m. PSTs	m. PSTp	m. AMEP	m. AMEM	m. AMES	m. AMP
CT cranium	11.64	--	-0.024	-0.024	0.27	0.76	0.3	2.06		CT cranium	4.44	--	0.4	0.86	0.23	0.5	0.38	4.14		CT cranium	13.27	--	-0.15	0.78	-0.12	-0.28	-0.07	-0.51
CT mandible	3.45	1.84	-0.02	-0.008	0.16	0.28	0.13	0.7		CT mandible	1.31	0.18	0.34	0.27	0.14	0.18	0.17	1.4		CT mandible	3.93	1.5	-0.13	0.25	-0.07	-0.1	-0.03	-0.17
Surface scan cranium	11.64	--	-0.03	-0.024	0.31	0.76	0.3	2.32		Surface scan cranium	4.44	--	0.47	0.86	0.27	0.5	0.37	4.66		Surface scan cranium	13.27	--	-0.18	0.78	-0.14	-0.28	-0.06	-0.57
Surface scan mandible	3.8	1.88	-0.02	-0.009	0.27	0.26	0.14	0.8		Surface scan mandible	1.45	0.19	0.36	0.3	0.24	0.17	0.17	1.6		Surface scan mandible	4.33	1.54	-0.14	0.28	-0.13	-0.1	-0.03	-0.2
Montior lizard	m. PT	m. PSTs	m. PSTp	m. AMEP	m. AMEP + m. AMEM	m. AMES	m. AMP
CT cranium	6.06	1.53	1.25	1.64	5.48	2.66	0.13
CT mandible	4.62	0.76	2.24	1.64	5.48	2.23	0.11
Surface scan cranium	6.93	1.53	1.12	1.48	5.48	2.66	0.11
Surface scan mandible	4.85	0.79	2.24	1.14	3.37	2.36	0.1
Green sea turtle	m. PTv	m. PTd	m. PST	m. PTp	m. PRp	m. AP	m. AEM	m. AES
CT cranium	0	0.83	3.33	3.33	1.875	3.75	21	16.7
CT mandible	0	0.5	--	1.25	--	1.875	15.75	8.35
Surface scan cranium	0	0.71	3.33	3.33	1.5	3.21	21	11.93
Surface scan mandible	0	0.45	--	1.25	--	2.05	15.75	8.35

## Sheet: Muscle force references
Alligator muscle force data (Porro et al. 2011)						Lizard muscle force data (Dutel et al. 2021)					Turtle muscle force data (Ferreira et al. 2020)
Muscle	Total force (N)	X force (N)	Y force (N)	Z force (N)		Muscle	Force (N)				Muscle	Force (N)
mAMES	13.3	8.19	10.33	−1.74		mAMEM	58.02				Adductor externus medialis			252
mAMEM	13.3	10.66	6.92	−3.93		mAMEP	29.59				Adductor externus superficialis			167
mAMEP	10.36	7.42	6.38	−3.40		mAMES	84.9				Adductor posterior			45
mAMP	125.59	55.68	111.79	−13.67		mAMP	3.84				Profundus principalis			15
mPSTs	11.61	−0.66	10.83	−4.13		mPstP	22.42				Pseudotemporalis			40
mMI	33.18	−1.89	30.94	−11.81		mPstS	24.43				Pterygoideus dorsalis			10
mPSTp	11.61	−0.24	8.56	7.84		mPt	193.9				Pterygoideus posterior			20
mPTd	291.17	186.17	70.96	212.35		Dm	32.8				Pterygoideus ventralis			0
mPTv	124.03	95.86	9.53	78.13
mDM	15.9	5.17	9.38	11.75
